# Supplementary material for: Photoinduced ligand release in a ruthenium(ii)-cobalt(iii) heterodinuclear system
Source: Royal Society of Chemistry journal article supplement (doi:10.1039/c1cc12729b), 2011-01-01
Supplement: c1cc12729b.pdf [file c1cc12729b.pdf]

Cite this: DOI: 10.1039/c0xx00000x

www.rsc.org/xxxxxx

ARTICLE TYPE

# Photoinduced Ligand Release in a Ruthenium(II)-Cobalt(III) Heterodinuclear System

Alan M. Downward,<sup>a</sup> Evan G. Moore<sup>b</sup> and Richard M. Hartshorn<sup>\*a</sup>

Received (in XXX, XXX) Xth XXXXXXXXXX 20XX, Accepted Xth XXXXXXXXXX 20XX

DOI: 10.1039/b000000x

## General Experimental

<sup>1</sup>H NMR spectra were recorded on either a Varian INOVA 500 spectrometer at 23°C, operating at 500 MHz or a Varian UNITY 300 NMR spectrometer at 23°C operating at 300 MHz. gCOSY, HSQCAD and gHMBC experiments were all performed on a Varian INOVA 500 spectrometer at 23°C, operating at 500 MHz. <sup>13</sup>C NMR spectra were recorded on either a Varian INOVA 500 spectrometer at 23°C operating at 125 MHz or a Varian UNITY 300 NMR spectrometer at 23°C operating at 75 MHz. The INOVA was equipped with a variable temperature and inverse-detection 5 mm probe or a triple-resonance indirect detection PFG probe. The UNITY was equipped with a variable temperature direct broadband 5 mm probe. Chemical shifts are expressed in parts per million (ppm) on the δ scale and were referenced to the appropriate solvent peaks, TMS or TMPS. DMSO-d<sub>6</sub> referenced to CD<sub>3</sub>(CHD<sub>2</sub>)SO at δH 2.50 (<sup>1</sup>H) and (CD<sub>3</sub>)<sub>2</sub>SO at δC 39.43 (<sup>13</sup>C). Acetonitrile-d<sub>3</sub> referenced to CHD<sub>2</sub>CN at δH 1.94 (<sup>1</sup>H) and CD<sub>3</sub>CN at δC 1.24 (<sup>13</sup>C). Methanol-d<sub>4</sub> referenced to CHD<sub>2</sub>OD at δH 3.31 (<sup>1</sup>H) and CD<sub>3</sub>OD at δC 49.05 (<sup>13</sup>C). TMS and TMPS were both referenced to δH 0 (<sup>1</sup>H) and δC 0 (<sup>13</sup>C). Electrospray Ionisation Mass Spectra were recorded on a Micromass LCT spectrometer using a probe voltage of 3200 V, an operating temperature of 150°C and a source temperature of 80°C. The carrier solvent was 1:1 CH<sub>3</sub>CN/H<sub>2</sub>O at 20 μL min<sup>-1</sup>. Typically, 10 μL of a 10 μL mL<sup>-1</sup> solution was injected. Leucine enkephalin was used as the lock mass internal standard.

UV-visible spectra were recorded on a Varian CARY Probe 50 UV-vis spectrophotometer or a Varian CARY 100 UV-vis spectrophotometer.

Steady state absorption measurements were performed using an absorption spectrometer (Cary Bio50, Varian). Steady state emission spectra were acquired with an emission spectrometer (Cary Eclipse, Varian). Quantum yield measurements were performed using the optically dilute method, using [Ru(bpy)<sub>3</sub>]Cl<sub>2</sub> in aqueous solution as a standard (φ<sub>ref</sub> = 4.2%). Time resolved emission lifetime experiments were performed using a nanosecond laser setup. The 355 nm tripled output of a Q-switched Nd:YAG (Continuum NY-61-10, Coherent) was used to drive an OPO system (Casix BBO, Shanghai Uniwave Technologies) which was tuned to 440 nm, and this output was focused on the

sample using all quartz optics. Emission was collected perpendicular to the excitation, collimated then refocused onto the entrance port of a 0.3 m triple grating monochromator (SpectraPro 300i, Acton Instruments) for spectral selection at 630 nm. The detector was a PMT tube (R928P, Hamamatsu), the output of which was sampled directly using a 500 MHz digital oscilloscope (TDS520, Tektronix). The instrument response function (IRF) for this setup was measured using scattered excitation to be ca. 8 ns at FWHM. Each resulting trace contained at least 1000 data points, and was averaged over 1000 shots. Data analysis was performed using a commercially available software package (Igor, Version 6.1.2.1, Wavemetrics). The quality of the fit was assessed using the reduced chi-squared χ<sup>2</sup> function and by an inspection of the weighted residuals.

Elemental analyses were performed by the Campbell Microanalytical Laboratory at the University of Otago.

[(bpy)<sub>2</sub>Ru(phen)](PF<sub>6</sub>)<sub>2</sub>,<sup>1</sup> pyridine-2-carbohydrazonamide,<sup>2</sup> [Co(en)<sub>2</sub>(OTf)<sub>2</sub>](OTf)<sub>3</sub>,<sup>3</sup> and [Co(tren)(OTf)<sub>2</sub>](OTf)<sub>3</sub><sup>3</sup> were synthesized according to literature methods.

## [(bpy)<sub>2</sub>Ru(pytp)](PF<sub>6</sub>)<sub>2</sub>

[(bpy)<sub>2</sub>Ru(pytp)](PF<sub>6</sub>)<sub>2</sub> was synthesised by a modification of the literature method of Liu.<sup>4</sup>

0.5 g [(bpy)<sub>2</sub>Ru(phen)](PF<sub>6</sub>)<sub>2</sub>·H<sub>2</sub>O was dissolved in 15 ml of CH<sub>3</sub>CN. 0.076 g of pyridine-2-carbohydrazonamide was dissolved in 5 ml of EtOH and then added to the acetonitrile solution. The reaction mixture was heated at reflux for 1 h after which it was filtered over celite and taken to dryness. The pure product was obtained by column chromatography on silica gel, eluting with an EtOH and 10% NaCl H<sub>2</sub>O solution (50:50). The major red band was collected and the ethanol removed under vacuum. The addition of a few drops of a methanolic saturated solution of NH<sub>4</sub>PF<sub>6</sub> precipitated out the product which was filtered and washed with 0 °C water, 0 °C EtOH and ether. Yield 0.30 g (52 %). <sup>1</sup>H NMR (500MHz; solvent CD<sub>3</sub>CN) δ 9.806 (dd, 1 H, phen), 9.721 (dd, 1 H, phen), 8.963 (d, 1 H, py), 8.927 (d, 1 H, py), 8.543 (m, 4 H, bpy), 8.302 (dd, 1 H, phen), 8.263 (dd, 1 H, phen), 8.140 (m, 1 H, py), 8.127 (m, 2 H, bpy), 8.030 (m, 2 H, bpy), 7.957 (m, 2 H, py), 7.848 (d, 2 H, bpy), 7.717 (d, 1 H, py), 7.682 (m, 2 H, bpy), 7.475 (m, 2 H, bpy), 7.269 (m, 2 H, bpy). ESI-MS: m/z (fragment) 869.38 ([M-(PF<sub>6</sub>)]<sup>+</sup>), 362.32 ([M-2(PF<sub>6</sub>)]<sup>2+</sup>).

UV-vis (CH<sub>3</sub>CN): λ<sub>max</sub> = 440.0 nm.

**[(bpy)<sub>2</sub>Ru(pytp)Co(tren)](PF<sub>6</sub>)<sub>5</sub>**

0.0586 g of [(bpy)<sub>2</sub>Ru(pytp)]<sup>2+</sup> and 0.0377g  
 5 [Co(tren)(OTf)<sub>2</sub>](OTf) were placed in a 25 ml round bottom  
 flask. The flask was wrapped in aluminium foil and 2 ml of  
 acetonitrile added. The flask was then stoppered and the  
 solution stirred for 3 hours at room temperature. The product  
 was precipitated out as the PF<sub>6</sub><sup>-</sup> salt by drop wise addition to a  
 10 stirred solution of 60 ml water and 3 ml of saturated solution  
 of NH<sub>4</sub>PF<sub>6</sub> in methanol. Yield 0.0515g <sup>1</sup>H NMR (500MHz;  
 solvent CD<sub>3</sub>CN) δ 9.856 (dd, 1 H), 9.589 (dd, 1 H), 9.333 (dd,  
 1 H), 8.880 (d, 1 H), 8.693 (t, 1 H), 8.562 (m, 4 H), 8.490 (dd,  
 1 H), 8.409 (dd, 1 H), 8.232 (m, 1 H), 8.143 (m, 2 H), 8.092 –  
 15 8.032 (m, 4 H, phen), 7.846 (m, 2 H), 7.750 (dd, 1 H), 7.689  
 (dd, 1 H), 7.490 (m, 2 H), 7.294 (m, 2 H), 5.299 (br s, 2 H,  
 tren), 4.637 (m, 2 H), 4.364 (br s, 2 H), 4.115 (m, 2 H), 3.637  
 (m, 4 H), 3.166 (m, 6 H). <sup>13</sup>C NMR (75 MHz; solvent  
 20 CD<sub>3</sub>CN) δ 165.166, 159.777, 158.013, 157.818, 157.785,  
 155.528, 154.595, 153.096, 152.991, 152.466, 151.849,  
 148.527, 147.127, 144.772, 139.280, 139.259, 139.217,  
 139.187, 136.405, 135.046, 132.958, 130.379, 128.679,  
 128.630, 128.583, 127.814, 127.766, 125.403, 65.248, 61.879,  
 47.867, 44.969. Anal. Calc. for C<sub>44</sub>H<sub>44</sub>F<sub>30</sub>N<sub>14</sub>P<sub>5</sub>CoRu.H<sub>2</sub>O  
 25 (1653.74): C 31.96, H 2.68, N 11.86%; found: C 31.70, H  
 3.50, N 11.05. ESI-MS: m/z (fragment) 1509.31 ([M-(PF<sub>6</sub>)]<sup>+</sup>),  
 362.32 ([M-2(PF<sub>6</sub>)]<sup>2+</sup>). UV-vis (CH<sub>3</sub>CN): λ<sub>max</sub> = 445 nm.

**[(bpy)<sub>2</sub>Ru(pytp)Co(en)](PF<sub>6</sub>)<sub>5</sub>**

30 0.0586 g of [(bpy)<sub>2</sub>Ru(pytp)]<sup>2+</sup> and 0.0377g  
 [Co(en)(OTf)<sub>2</sub>](OTf) were placed in a 25 ml round bottom  
 flask. The flask was wrapped in aluminium foil and 2 ml of  
 acetonitrile added. The flask was then stoppered and the  
 solution stirred for 3 hours at room temperature. The product  
 35 was precipitated out as the PF<sub>6</sub><sup>-</sup> salt by drop wise addition to a  
 stirred solution of 60 ml water and 3 ml of saturated solution  
 of NH<sub>4</sub>PF<sub>6</sub> in methanol. Yield 0.0515g <sup>1</sup>H NMR (500 MHz;  
 solvent CD<sub>3</sub>CN) δ 9.851 (m, 1 H), 9.781 (m, 1 H), 9.304 (d, 1  
 H), 8.830 (d, 1 H), 8.714 (t, 1 H), 8.554 (m, 4 H), 8.470 (m, 1  
 40 H), 8.412 (m, 1 H), 8.268 (m, 1 H), 8.144 (m, 2 H), 8.061 (m,  
 4 H), 7.842 (m, 2 H), 7.742 (t, 1 H), 7.688 (t, 1 H), 7.489 (m,  
 2 H), 7.300 (m, 2 H), 3.156 (m, 4 H), 3.758 (m, 4 H). Anal.  
 Calc. for C<sub>42</sub>H<sub>42</sub>F<sub>30</sub>N<sub>14</sub>P<sub>5</sub>CoRu.H<sub>2</sub>O (1627.70): C 30.99, H  
 2.60, N 12.05%; found: C 30.32, H 3.26, N 11.59. UV-vis  
 45 (CH<sub>3</sub>CN): λ<sub>max</sub> = 445 nm.

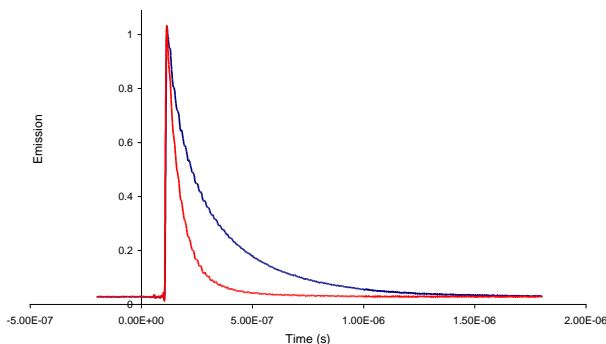

50 **Fig. S1** Lifetime measurements for [(bpy)<sub>2</sub>Ru(pytp)]<sup>2+</sup> (blue) and  
 [(bpy)<sub>2</sub>Ru(pytp)Co(tren)]<sup>5+</sup> (red)

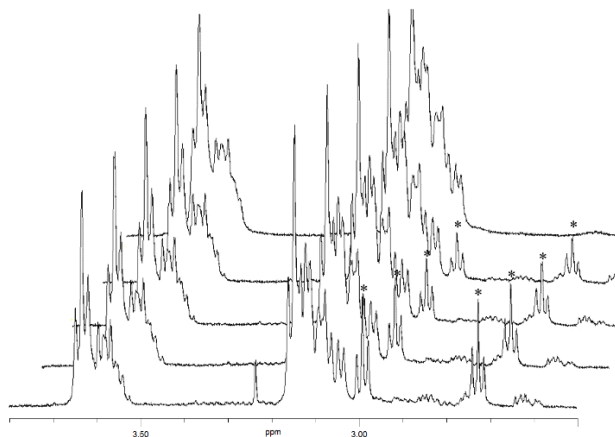

55 **Fig. S2** Photoinduced release of tren from [(bpy)<sub>2</sub>Ru(pytp)Co(tren)]<sup>5+</sup>  
 (from top to bottom: 0, 1, 2, 3, 4, 5 hr irradiation time); the peaks  
 assigned to free tren are marked with an asterisk

**Notes and references**

- <sup>a</sup> Department of Chemistry, University of Canterbury, Private Bag 4800,  
 Christchurch, New Zealand. Fax: +64 3 3642110; Tel: +64 3 3642874;  
 E-mail: richard.hartshorn@canterbury.ac.nz  
<sup>b</sup> School of Chemistry, The University of Melbourne, Victoria 3010,  
 Australia. Fax: +61 3 93475180; Tel: +61 3 83445939; E-mail:  
 egmoore@unimelb.edu.au
- 1 C. A. Goss and H. D. Abruna, *Inorganic Chemistry*, 1985, **24**, 4263.
  - 2 F. Weldon, L. Hammarstrom, E. Mukhtar, R. Hage, E. Gunneweg, J.  
 55 G. Haasnoot, J. Reedijk, W. R. Browne, A. L. Guckian and J. G. Vos,  
*Inorganic Chemistry*, 2004, **43**, 4471.
  - 3 N. E. Dixon, W. G. Jackson, G. A. Lawrance and A. M. Sargeson,  
*Inorganic Syntheses*, 1983, **22**, 103-107..
  - 4 J. Liu, X.-H. Zou, Q.-L. Zhang, W.-J. Mei, J.-Z. Liu and L.-N. Ji,  
 70 *Metal-Based Drugs*, 2000, **7**, 343.
